# Supplementary material for: Interaction Profiles of Central Nervous System Active Drugs at Human Organic Cation Transporters 1–3 and Human Plasma Membrane Monoamine Transporter
Source: MDPI journal article supplement (doi:10.3390/ijms222312995), 2021-11-30
Supplement: s1 [file s1]

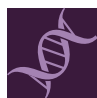

Supplementary Material

# Interaction Profiles of Central Nervous System Active Drugs at Human Organic Cation Transporters 1–3 and Human Plasma Membrane Monoamine Transporter

Thomas J. F. Angenooth <sup>1,†</sup> , Stevan Stankovic <sup>1,†</sup>, Marco Niello <sup>1</sup> , Marion Holy <sup>1</sup>, Simon D. Brandt <sup>2</sup> , Harald H. Sitte <sup>1,\*</sup> and Julian Maier <sup>1</sup>

<sup>1</sup> Center for Physiology and Pharmacology, Institute of Pharmacology, Medical University of Vienna, Währingerstraße 13A, 1090 Vienna, Austria; thomas.angenooth@gmx.net (T.J.F.A.); stevan-stankovic@hotmail.com (S.S.); marco.niello@meduniwien.ac.at (M.N.); marion.holy@meduniwien.ac.at (M.H.); julian.maier@meduniwien.ac.at (J.M.)

<sup>2</sup> School of Pharmacy and Biomolecular Sciences, Liverpool John Moores University, Byrom Street, Liverpool L3 3AE, UK; s.brandt@ljmu.ac.uk

\* Correspondence: harald.sitte@meduniwien.ac.at

† These authors contributed equally to this work.

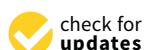

**Citation:** Angenooth, T.J.F.; Stankovic, S.; Niello, M.; Holy, M.; Brandt, S.D.; Sitte, H.H.; Maier, J. Interaction Profiles of Central Nervous System Active Drugs at Human Organic Cation Transporters 1–3 and Human Plasma Membrane Monoamine Transporter. *Int. J. Mol. Sci.* **2021**, *22*, 12995. <https://doi.org/10.3390/ijms222312995>

Academic Editor: Giuliano Ciarimboli

Received: 21 October 2021

Accepted: 28 November 2021

Published: 30 November 2021

**Publisher's Note:** MDPI stays neutral with regard to jurisdictional claims in published maps and institutional affiliations.

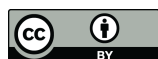

**Copyright:** © 2021 by the authors. Licensee MDPI, Basel, Switzerland. This article is an open access article distributed under the terms and conditions of the Creative Commons Attribution (CC BY) license (<https://creativecommons.org/licenses/by/4.0/>).

## Supplementary Materials

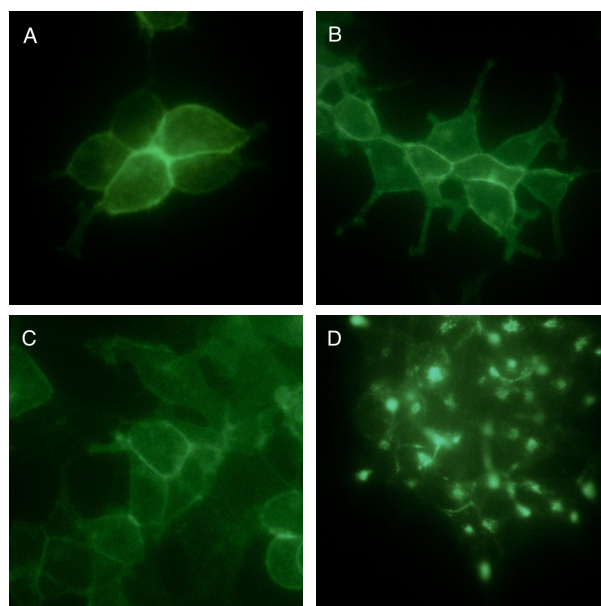

**Figure S1.** Microscopy images depicting cells expressing YFP-tagged transporters of interest: (A): hOCT1, (B): hOCT2, (C): hOCT3 and (D): hPMAT.

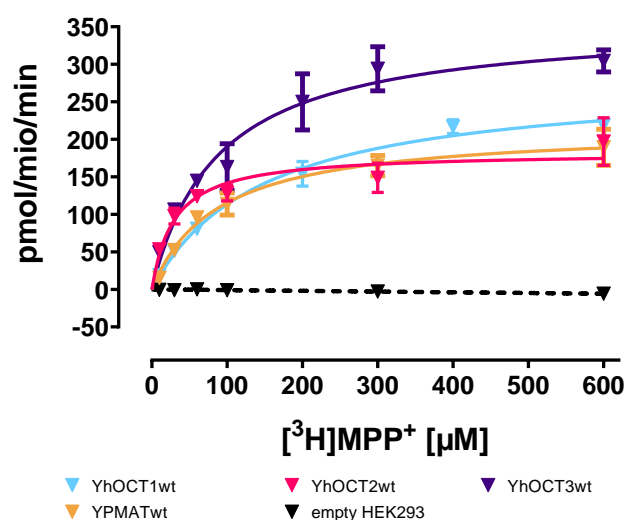

**Figure S2.** Representative experiments depicting concentration dependant uptake of tritiated  $MPP^+$  by the transporters (hOCT1 light blue, hOCT2 red, hOCT3 violet and hPMAT orange, all transiently transfected ) of interest and empty HEK293 cells (dashed line) as control.

**Table S1.**  $IC_{50}$  comparison table. Red boxes indicate that no respective data for comparison was found. n.s. = non-significant. Red text color: experiments were performed with  $ASP^+$  as substrate. Orange text color: values show the percentage of inhibition at 100  $\mu M$  of the respective compound. Blue text color:  $K_i$  ( $\mu M$ ) values were measured.

|                               | Substance                  | hOCT1                                          |                                | hOCT2                                        |                                | hOCT3                                                                                                 |                                | hPMAT                |                                |
|-------------------------------|----------------------------|------------------------------------------------|--------------------------------|----------------------------------------------|--------------------------------|-------------------------------------------------------------------------------------------------------|--------------------------------|----------------------|--------------------------------|
|                               |                            | $IC_{50}$ literature                           | $IC_{50}$ [ $\mu M$ ] (95%-CI) | $IC_{50}$ literature                         | $IC_{50}$ [ $\mu M$ ] (95%-CI) | $IC_{50}$ literature                                                                                  | $IC_{50}$ [ $\mu M$ ] (95%-CI) | $IC_{50}$ literature | $IC_{50}$ [ $\mu M$ ] (95%-CI) |
| Antidepressants               | Bupropion                  | 161.00 [1]                                     | 5.36 [4.19–6.85]               | 28.60 [1]<br>32.20 [2]                       | 32.86 [21.55–50.10]            | 738.00 [1]                                                                                            | 185.60 [9.36–3681]             | 115.00 [3]           | 96.96 [56.01–167.80]           |
|                               | S-Citalopram               |                                                | 7.15 [5.59–9.15]               |                                              | 59.90 [34.26–104.70]           |                                                                                                       | n.s.                           |                      | 159.80 [83.29–306.50]          |
|                               | R-Citalopram               |                                                | 5.11 [4.11–6.37]               |                                              | 46.63 [25.56–85.07]            |                                                                                                       | n.s.                           |                      | 58.32 [37.46–90.79]            |
|                               | Citalopram                 | 13.2 [1]                                       |                                | 115.00 [1]                                   |                                | 188.00 [1]                                                                                            |                                | 116.67 [4]           |                                |
| Antiepileptics                | Diazepam                   | 5.0% [5]                                       | n.s.                           |                                              | 917.30 [229.70–3663]           | 2.00 [6]<br>40.00 (mOCT3) [6]                                                                         | 44.46 [36.04–54.85]            |                      | 29.81 [18.41–48.27]            |
|                               | Phenobarbital              | −6.0% [5]                                      | n.s.                           |                                              | n.s.                           |                                                                                                       | n.s.                           |                      | 1027 [39.71–26584]             |
| Psychostimulants              | d-Amphetamine              | 202 ± 68 [7]<br>96.7 ± 37 [8]                  | 8.39 [6.90–10.20]              | 10.5 ± 2.6 [7]<br>20.30 ± 16.9 [8]           | 2.21 [1.70–2.87]               | 460 ± 140 [7]<br>363 ± 56.4 [8]<br>42 ± 7 [9]<br>41.5 ± 7.5 (DA)<br>24.1 ± 70 (5-HT)[10]<br>n.a. [11] | 336.6 [179.70–630.40]          |                      | 71.77 [46.81–110.00]           |
|                               | Cocaine                    | 85 ± 22 [7]                                    | 6.66 [5.28–8.39]               | 113 ± 21 [7]                                 | 27.80 [19.17–40.32]            | n.a. [7] [12]<br>1631 [13]<br>>1000 [14]                                                              | n.s.                           |                      | n.s.                           |
|                               | $\alpha$ -PVP              | 1.31 [13]                                      |                                | 17.5 ± 2.5 [14]                              |                                |                                                                                                       |                                | 13.42 [13]           |                                |
|                               | R- $\alpha$ -PVP           |                                                | 2.15 [1.59–2.90]               | 5.62 [13]                                    | 13.09 [9.89–17.32]             |                                                                                                       | 1016 [364.90–2826]             |                      | n.s.                           |
|                               | S- $\alpha$ -PVP           |                                                | 1.07 [0.81–1.40]               |                                              | 15.02 [11.28–20.00]            |                                                                                                       | 456.7 [144.90–1439]            |                      | n.s.                           |
| Emerging Therapeutics         | Ketamine                   | 114.5 ± 43.7 [7]<br>73.9 ± 15.2 ( $K_m$ ) [15] | 23.47 [13.34–41.37]            | 22.7 ± 6.3 [7]<br>33.5 ± 20.3 ( $K_m$ ) [15] | 12.46 [9.71–15.98]             | 225.7 ± 65 [7]<br>440 [6]<br>52.9 ± 15.0 ( $K_m$ ) [15]                                               | 1028 [589.40–1792]             |                      | 134.60 [54.70–331.20]          |
|                               | 2-Fluoro-deschloroketamine |                                                | 14.07 [10.11–19.56]            |                                              | 19.18 [14.89–24.70]            |                                                                                                       | 265.5 [167.60–420.50]          |                      | n.s.                           |
|                               | MDMA                       | 24.20 ± 9.20 [7]                               | 1.14 [0.90–1.44]               | 1.63 ± 0.62 [7]                              | 2.71 [2.22–3.31]               | 73.60 ± 50.30 [7]                                                                                     | 153.90 [87.41–270.90]          |                      | 7.77 [5.92–10.21]              |
|                               | Psilocin                   |                                                | 63.48 [44.97–89.62]            |                                              | n.s.                           |                                                                                                       | n.s.                           |                      | 698.20 [88.81–5488]            |
| Analgesics                    | Tramadol                   | 60.2% [5]<br>30 [16]                           | 5.60 [4.65–6.75]               |                                              | 64.10 [39.58–103.80]           |                                                                                                       | n.s.                           |                      | 74.19 [32.67–168.50]           |
|                               | O-Desmethyl tramadol       | 172 [16]                                       | 24.16 [19.12–30.54]            |                                              | 371.90 [44.37–3116]            |                                                                                                       | n.s.                           |                      | n.s.                           |
| Drugs for Narcolepsy and ADHD | Methylphenidate            |                                                | 0.36 [0.27–0.46]               |                                              | 28.80 [15.11–54.90]            |                                                                                                       | n.s.                           |                      | n.s.                           |
|                               | Modafinil                  |                                                | n.s.                           |                                              | n.s.                           |                                                                                                       | n.s.                           |                      | n.s.                           |
| Control                       | Decynium-22                |                                                | 2.66 [2.049–3.44]              |                                              | 4.56 [3.786–5.496]             |                                                                                                       | 0.16 [0.1358–0.1904]           |                      | 0.35 [0.2439–0.5042]           |

|                          |                          |                             |                          |                   |
|--------------------------|--------------------------|-----------------------------|--------------------------|-------------------|
| Experiments with $MPP^+$ | Experiments with $ASP^+$ | % inhibition at 100 $\mu M$ | $K_i$ ( $\mu M$ ) Values | no data available |
|--------------------------|--------------------------|-----------------------------|--------------------------|-------------------|

## References

- Haenisch, B.; Drescher, E.; Thieme, L.; Xin, H.; Giros, B.; Gautron, S.; Bönsch, H. Interaction of antidepressant and antipsychotic drugs with the human organic cation transporters hOCT1, hOCT2 and hOCT3. *Naunyn-Schmiedeberg's Archives of Pharmacology* **2012**, *385*, 1017–1023. doi:10.1007/s00210-012-0781-8.
- Sandoval, P.J.; Zorn, K.M.; Clark, A.M.; Ekins, S.; Wright, S.H. Assessment of substrate-dependent ligand interactions at the organic cation transporter OCT2 using six model substrates. *Molecular Pharmacology* **2018**, *94*, 1057–1068. doi:10.1124/mol.117.111443.

3. Haenisch, B.; Bönisch, H. Interaction of the human plasma membrane monoamine transporter (hPMAT) with antidepressants and antipsychotics. *Naunyn-Schmiedeberg's Archives of Pharmacology* **2010**, *381*, 33–39. doi:10.1007/s00210-009-0479-8.
4. Zhou, M.; Engel, K.; Wang, J. Evidence for significant contribution of a newly identified monoamine transporter (PMAT) to serotonin uptake in the human brain. *Biochemical Pharmacology* **2007**, *73*, 147–154. doi:10.1016/j.bcp.2006.09.008.
5. Ahlin, G.; Karlsson, J.; Pedersen, J.M.; Gustavsson, L.; Larsson, R.; Matsson, P.; Norinder, U.; Bergström, C.A.; Artursson, P. Structural requirements for drug inhibition of the liver specific human organic cation transport protein 1. *Journal of Medicinal Chemistry* **2008**, *51*, 5932–5942. doi:10.1021/jm8003152.
6. Massmann, V.; Edemir, B.; Schlatter, E.; Al-Monajjed, R.; Harrach, S.; Klassen, P.; Holle, S.K.; Sindic, A.; Dobrivojevic, M.; Pavenstädt, H.; Ciarimboli, G. The organic cation transporter 3 (OCT3) as molecular target of psychotropic drugs: Transport characteristics and acute regulation of cloned murine OCT3. *Pflügers Archiv European Journal of Physiology* **2014**, *466*, 517–527. doi:10.1007/s00424-013-1335-8.
7. Amphoux, A.; Vialou, V.; Drescher, E.; Brüss, M.; La Cour, C.M.; Rochat, C.; Millan, M.J.; Giros, B.; Bönisch, H.; Gautron, S. Differential pharmacological in vitro properties of organic cation transporters and regional distribution in rat brain. *Neuropharmacology* **2006**, *50*, 941–952. doi:10.1016/j.neuropharm.2006.01.005.
8. Wagner, D.J.; Sager, J.E.; Duan, H.; Isoherranen, N.; Wang, J. Interaction and transport of methamphetamine and its primary metabolites by organic cation and multidrug and toxin extrusion transporters. *Drug Metabolism and Disposition* **2017**, *45*, 770–778. doi:10.1124/dmd.116.074708.
9. Wu, X.; Kekuda, R.; Huang, W.; Fei, Y.J.; Leibach, F.H.; Chen, J.; Conway, S.J.; Ganapathy, V. Identity of the organic cation transporter OCT3 as the extraneuronal monoamine transporter (uptake2) and evidence for the expression of the transporter in the brain. *Journal of Biological Chemistry* **1998**, *273*, 32776–32786. doi:10.1074/jbc.273.49.32776.
10. Zhu, H.J.; Appel, D.I.; Gründemann, D.; Markowitz, J.S. Interaction of organic cation transporter 3 (SLC22A3) and amphetamine. *Journal of Neurochemistry* **2010**, *114*, 142–149. doi:10.1111/j.1471-4159.2010.06738.x.
11. Mayer, F.P.; Schmid, D.; Owens, W.A.; Gould, G.G.; Apushkin, M.; Kudlacek, O.; Salzer, I.; Boehm, S.; Chiba, P.; Williams, P.H.; Wu, H.H.; Gether, U.; Koek, W.; Daws, L.C.; Sitte, H.H. An unsuspected role for organic cation transporter 3 in the actions of amphetamine. *Neuropsychopharmacology* **2018**, *43*, 2408–2417. doi:10.1038/s41386-018-0053-5.
12. Mayer, F.P.; Schmid, D.; Holy, M.; Daws, L.C.; Sitte, H.H. “Polytox” synthetic cathinone abuse: A potential role for organic cation transporter 3 in combined cathinone-induced efflux. *Neurochemistry International* **2019**, *123*, 7–12. doi:10.1016/j.neuint.2018.09.008.
13. Maier, J.; Niello, M.; Rudin, D.; Daws, L.C.; Sitte, H.H. The Interaction of Organic Cation Transporters 1-3 and PMAT with Psychoactive Substances. *Handbook of experimental pharmacology* **2021**, *3*, 1–20. doi:10.1007/164\_2021\_469.
14. Duart-Castells, L.; Nadal-Gratacós, N.; Muralter, M.; Puster, B.; Berzosa, X.; Estrada-Tejedor, R.; Niello, M.; Bhat, S.; Pubill, D.; Camarasa, J.; Sitte, H.H.; Escubedo, E.; López-Arnau, R. Role of amino terminal substitutions in the pharmacological, rewarding and psychostimulant profiles of novel synthetic cathinones. *Neuropharmacology* **2021**, *186*, 1–19. doi:10.1016/j.neuropharm.2021.108475.
15. Keiser, M.; Hasan, M.; Oswald, S. Affinity of Ketamine to Clinically Relevant Transporters. *Molecular Pharmaceutics* **2018**, *15*, 326–331. doi:10.1021/acs.molpharmaceut.7b00627.
16. Tzvetkov, M.V.; Saadatmand, A.R.; Lötsch, J.; Tegeder, I.; Stingl, J.C.; Brockmöller, J. Genetically polymorphic OCT1: Another piece in the puzzle of the variable pharmacokinetics and pharmacodynamics of the opioidergic drug tramadol. *Clinical Pharmacology and Therapeutics* **2011**, *90*, 143–150. doi:10.1038/clpt.2011.56.
